# Supplementary material for: Single-cell transcriptome identifies molecular subtype of autism spectrum disorder impacted by de novo loss-of-function variants regulating glial cells
Source: Hum Genomics. 2021 Nov 21;15:68. doi: 10.1186/s40246-021-00368-7 (PMC8607722; doi:10.1186/s40246-021-00368-7)
Supplement: Supplementary file 4 — Additional file 4. Supplementary Tables - 7, 8, 9, 11, 12. [file 40246_2021_368_MOESM4_ESM.xlsx]

## Sheet: ACC-late replication
Supplementary Table 7A: Enrichment of LOF genes across developmental time
pathwayid	pathwayname	Overlap	Cluster_len	Gene_length	Pvalue	Oddsratio	FDR
Cluster0	Cluster0	53	558	1068	7.00479e-07	2.21556	1.08256e-06
Cluster1	Cluster1	48	475	1068	3.98032e-07	2.36981	6.76654e-07
Cluster2	Cluster2	124	2325	1068	0.0551682	1.17753	0.0586162
Cluster3	Cluster3	76	830	1068	1.28789e-08	2.15175	2.73676e-08
Cluster4	Cluster4	94	1014	1068	1.15072e-10	2.20396	3.91246e-10
Cluster5	Cluster5	79	1048	1068	1.53121e-05	1.72801	1.85933e-05
Cluster6	Cluster6	77	662	1068	1.08685e-13	2.83509	1.79152e-12
Cluster7	Cluster7	89	907	1068	1.93104e-11	2.34656	8.20693e-11
Cluster8	Cluster8	108	1145	1068	1.42424e-12	2.2667	8.07069e-12
Cluster9	Cluster9	169	2579	1068	1.92893e-06	1.52273	2.52245e-06
Cluster10	Cluster10	183	2506	1068	2.23531e-10	1.74542	6.33338e-10
Cluster11	Cluster11	50	523	1068	1.19406e-06	2.22824	1.69159e-06
Cluster12	Cluster12	102	1533	1068	0.000146901	1.51268	0.000166487
Cluster13	Cluster13	183	2671	1068	2.98224e-08	1.61596	5.63312e-08
Cluster14	Cluster14	72	604	1068	2.10767e-13	2.90765	1.79152e-12
Cluster15	Cluster15	37	1003	1068	0.942878	0.778891	0.942878
Cluster16	Cluster16	50	431	1068	2.69199e-09	2.77801	6.5377e-09

## Sheet: ACC-early replication
Supplementary Table 7B: Enrichment of LOF genes across developmental time
pathwayid	pathwayname	Overlap	Cluster_len	Gene_length	Pvalue	Oddsratio	FDR
Cluster0	Cluster0	91	558	3617	0.368833	1.04538	0.78377
Cluster1	Cluster1	69	475	3617	0.78355	0.909037	0.856545
Cluster2	Cluster2	451	2325	3617	3.24736e-07	1.33092	5.52051e-06
Cluster3	Cluster3	124	830	3617	0.750746	0.939113	0.856545
Cluster4	Cluster4	169	1014	3617	0.211641	1.0753	0.513984
Cluster5	Cluster5	163	1048	3617	0.576084	0.986385	0.856545
Cluster6	Cluster6	95	662	3617	0.851279	0.895131	0.856545
Cluster7	Cluster7	144	907	3617	0.464077	1.01184	0.788931
Cluster8	Cluster8	173	1145	3617	0.73391	0.951456	0.856545
Cluster9	Cluster9	445	2579	3617	0.0133782	1.13398	0.0758099
Cluster10	Cluster10	429	2506	3617	0.02357	1.12126	0.0801379
Cluster11	Cluster11	74	523	3617	0.856545	0.880766	0.856545
Cluster12	Cluster12	270	1533	3617	0.0205917	1.15738	0.0801379
Cluster13	Cluster13	480	2671	3617	0.000460622	1.20062	0.00391528
Cluster14	Cluster14	87	604	3617	0.831566	0.899382	0.856545
Cluster15	Cluster15	178	1003	3617	0.04135	1.16426	0.117158
Cluster16	Cluster16	69	431	3617	0.455892	1.02186	0.788931

## Sheet: MTG-late replication
Supplementary Table 7C: Enrichment of LOF genes across developmental time
pathwayid	pathwayname	Overlap	Cluster_len	Gene_length	Pvalue	Oddsratio	FDR
Cluster0	Cluster0	59	620	1068	1.54384e-07	2.22749	1.98494e-07
Cluster1	Cluster1	45	349	1068	6.03179e-10	3.12926	1.35715e-09
Cluster2	Cluster2	46	367	1068	9.87573e-10	3.02998	1.97515e-09
Cluster3	Cluster3	70	641	1068	2.80472e-11	2.62358	1.26213e-10
Cluster4	Cluster4	83	898	1068	1.72678e-09	2.18315	3.10821e-09
Cluster5	Cluster5	88	1083	1068	2.23022e-07	1.88947	2.67627e-07
Cluster6	Cluster6	95	1122	1068	9.88871e-09	1.98735	1.61815e-08
Cluster7	Cluster7	66	602	1068	8.87522e-11	2.62895	3.19508e-10
Cluster8	Cluster8	83	1049	1068	1.45556e-06	1.82889	1.54118e-06
Cluster9	Cluster9	125	1292	1068	3.04564e-15	2.35861	2.74107e-14
Cluster10	Cluster10	175	2370	1068	2.56742e-10	1.76206	7.70226e-10
Cluster11	Cluster11	173	2510	1068	5.15618e-08	1.62068	7.73426e-08
Cluster12	Cluster12	101	926	1068	9.30224e-16	2.67216	1.6744e-14
Cluster13	Cluster13	62	658	1068	1.06063e-07	2.20604	1.46856e-07
Cluster14	Cluster14	113	1261	1068	1.10233e-11	2.14216	6.61401e-11
Cluster15	Cluster15	97	1091	1068	5.4684e-10	2.10415	1.35715e-09
Cluster16	Cluster16	107	1692	1068	0.000650752	1.42929	0.000650752
Cluster17	Cluster17	97	1235	1068	2.54389e-07	1.8252	2.86188e-07

## Sheet: MTG-early replication
Supplementary Table 7D: Enrichment of LOF genes across developmental time
pathwayid	pathwayname	Overlap	Cluster_len	Gene_length	Pvalue	Oddsratio	FDR
Cluster0	Cluster0	98	620	3617	0.495248	1.00624	0.891447
Cluster1	Cluster1	50	349	3617	0.785757	0.894697	0.901535
Cluster2	Cluster2	54	367	3617	0.725421	0.923368	0.901535
Cluster3	Cluster3	93	641	3617	0.819103	0.907078	0.901535
Cluster4	Cluster4	131	898	3617	0.841981	0.91211	0.901535
Cluster5	Cluster5	165	1083	3617	0.688068	0.961428	0.901535
Cluster6	Cluster6	193	1122	3617	0.0896179	1.11972	0.322625
Cluster7	Cluster7	84	602	3617	0.898938	0.865895	0.901535
Cluster8	Cluster8	163	1049	3617	0.581409	0.985218	0.901535
Cluster9	Cluster9	221	1292	3617	0.0875654	1.1127	0.322625
Cluster10	Cluster10	402	2370	3617	0.0440706	1.1065	0.264424
Cluster11	Cluster11	441	2510	3617	0.00427815	1.16199	0.0388007
Cluster12	Cluster12	151	926	3617	0.323833	1.04604	0.817448
Cluster13	Cluster13	106	658	3617	0.408724	1.02994	0.817448
Cluster14	Cluster14	210	1261	3617	0.186092	1.07512	0.558276
Cluster15	Cluster15	157	1091	3617	0.901535	0.8963	0.901535
Cluster16	Cluster16	305	1692	3617	0.00431118	1.19483	0.0388007
Cluster17	Cluster17	198	1235	3617	0.39305	1.02454	0.817448

## Sheet: VISP-late replication
Supplementary Table 7E: Enrichment of LOF genes across developmental time
pathwayid	pathwayname	Overlap	Cluster_len	Gene_length	Pvalue	Oddsratio	FDR
Cluster0	Cluster0	60	545	1068	5.51163e-10	2.63222	2.34244e-09
Cluster1	Cluster1	41	582	1068	0.00550137	1.57846	0.00623489
Cluster2	Cluster2	42	486	1068	8.89564e-05	1.98107	0.000116328
Cluster3	Cluster3	62	718	1068	2.08935e-06	1.99877	3.55189e-06
Cluster4	Cluster4	84	725	1068	9.73106e-15	2.83524	1.65428e-13
Cluster5	Cluster5	50	620	1068	0.000114027	1.84076	0.000138461
Cluster6	Cluster6	41	837	1068	0.383975	1.06006	0.383975
Cluster7	Cluster7	98	1204	1068	4.03952e-08	1.90238	9.81027e-08
Cluster8	Cluster8	176	2535	1068	2.29781e-08	1.63706	6.51046e-08
Cluster9	Cluster9	74	797	1068	1.1274e-08	2.18371	3.83316e-08
Cluster10	Cluster10	74	906	1068	1.75045e-06	1.88798	3.30641e-06
Cluster11	Cluster11	155	2311	1068	1.48465e-06	1.55718	3.15488e-06
Cluster12	Cluster12	65	530	1068	8.92439e-13	2.99155	7.58573e-12
Cluster13	Cluster13	54	649	1068	2.66448e-05	1.90969	4.11783e-05
Cluster14	Cluster14	83	795	1068	4.0633e-12	2.51117	2.30254e-11
Cluster15	Cluster15	91	1686	1068	0.0732801	1.1876	0.0778601
Cluster16	Cluster16	159	2539	1068	4.77839e-05	1.43694	6.76939e-05

## Sheet: VISP-early replication
Supplementary Table 7F: Enrichment of LOF genes across developmental time
pathwayid	pathwayname	Overlap	Cluster_len	Gene_length	Pvalue	Oddsratio	FDR
Cluster0	Cluster0	80	545	3617	0.768302	0.920165	0.810632
Cluster1	Cluster1	101	582	3617	0.150476	1.12888	0.284233
Cluster2	Cluster2	82	486	3617	0.258886	1.08974	0.366755
Cluster3	Cluster3	114	718	3617	0.471214	1.01181	0.572188
Cluster4	Cluster4	106	725	3617	0.810632	0.915218	0.810632
Cluster5	Cluster5	121	620	3617	0.00601746	1.30979	0.0170495
Cluster6	Cluster6	168	837	3617	0.000376725	1.36254	0.00128087
Cluster7	Cluster7	209	1204	3617	0.060961	1.13336	0.148048
Cluster8	Cluster8	477	2535	3617	5.13379e-06	1.27883	8.72744e-05
Cluster9	Cluster9	127	797	3617	0.450041	1.01636	0.572188
Cluster10	Cluster10	156	906	3617	0.113481	1.11984	0.241147
Cluster11	Cluster11	436	2311	3617	1.05818e-05	1.27983	8.9945e-05
Cluster12	Cluster12	90	530	3617	0.22707	1.0986	0.352029
Cluster13	Cluster13	100	649	3617	0.606157	0.975432	0.686977
Cluster14	Cluster14	133	795	3617	0.227784	1.07957	0.352029
Cluster15	Cluster15	318	1686	3617	0.000183528	1.26937	0.000779995
Cluster16	Cluster16	463	2539	3617	0.000162427	1.2238	0.000779995

## Sheet: ACC-LOF
Supplementary Table 8A: Enrichment of ASD missense and LOF mutation genes across clusters
pathwayid	pathwayname	Pvalue	Oddsratio	FDR
Cluster0	Cluster0	1.22802e-05	2.17354	2.60955e-05
Cluster1	Cluster1	0.11673	1.3317	0.124584
Cluster2	Cluster2	7.65397e-06	1.57441	1.85882e-05
Cluster3	Cluster3	0.000165459	1.78531	0.000281281
Cluster4	Cluster4	4.26404e-07	2.01057	1.77017e-06
Cluster5	Cluster5	7.03683e-07	1.96987	1.99377e-06
Cluster6	Cluster6	0.00888779	1.56333	0.012591
Cluster7	Cluster7	7.4678e-05	1.79638	0.000141059
Cluster8	Cluster8	0.000255676	1.63957	0.000395136
Cluster9	Cluster9	1.89215e-09	1.77935	1.60832e-08
Cluster10	Cluster10	1.54539e-09	1.79496	1.60832e-08
Cluster11	Cluster11	0.117256	1.31419	0.124584
Cluster12	Cluster12	5.20639e-07	1.80727	1.77017e-06
Cluster13	Cluster13	1.16093e-08	1.72072	6.57861e-08
Cluster14	Cluster14	0.0106821	1.57343	0.0139689
Cluster15	Cluster15	0.908015	0.794252	0.908015
Cluster16	Cluster16	0.0318441	1.54828	0.0386679

## Sheet: ACC-missense
Supplementary Table 8B: Enrichment of ASD missense and LOF mutation genes across clusters
pathwayid	pathwayname	Pvalue	Oddsratio	FDR
Cluster10	Cluster10	5.72e-42	1.97679	9.72e-41
Cluster13	Cluster13	1.77e-32	1.79796	1.5e-31
Cluster12	Cluster12	1.95e-28	1.98229	1.11e-27
Cluster9	Cluster9	7.03e-27	1.71774	2.99e-26
Cluster5	Cluster5	2.67e-21	2.00364	9.07e-21
Cluster8	Cluster8	1.73e-18	1.86533	4.9e-18
Cluster6	Cluster6	6.71e-17	2.12373	1.63e-16
Cluster7	Cluster7	1.54e-16	1.91679	3.27e-16
Cluster3	Cluster3	2.34e-14	1.87465	4.42e-14
Cluster4	Cluster4	5.82e-14	1.76496	9.89e-14
Cluster2	Cluster2	1.78e-13	1.48195	2.75e-13
Cluster16	Cluster16	4.49e-12	2.14703	6.36e-12
Cluster11	Cluster11	6.58e-12	2.00753	8.6e-12
Cluster14	Cluster14	1.22e-10	1.85159	1.48e-10
Cluster0	Cluster0	6.71e-10	1.84659	7.61e-10
Cluster1	Cluster1	6.35e-05	1.54345	6.75e-05
Cluster15	Cluster15	0.22796	1.06738	0.22796

## Sheet: MTG-LOF
Supplementary Table 8C: Enrichment of ASD missense and LOF mutation genes across clusters
pathwayid	pathwayname	Pvalue	Oddsratio	FDR
Cluster0	Cluster0	0.000268598	1.88325	0.000371905
Cluster1	Cluster1	0.00136922	2.03613	0.00144976
Cluster2	Cluster2	0.0561086	1.51021	0.0561086
Cluster3	Cluster3	3.41662e-06	2.16989	8.7856e-06
Cluster4	Cluster4	0.000597862	1.67224	0.000672595
Cluster5	Cluster5	8.36158e-06	1.8367	1.88136e-05
Cluster6	Cluster6	6.73694e-08	2.03704	4.04216e-07
Cluster7	Cluster7	0.000145064	1.94526	0.000237378
Cluster8	Cluster8	3.59707e-07	2.00017	1.61868e-06
Cluster9	Cluster9	0.00036099	1.5834	0.00046413
Cluster10	Cluster10	1.31323e-09	1.82017	2.36382e-08
Cluster11	Cluster11	3.11498e-09	1.77624	2.80348e-08
Cluster12	Cluster12	3.80619e-05	1.82625	6.85115e-05
Cluster13	Cluster13	0.000247623	1.86101	0.000371435
Cluster14	Cluster14	3.56504e-05	1.70598	6.85115e-05
Cluster15	Cluster15	0.000563396	1.61068	0.000672595
Cluster16	Cluster16	6.8871e-07	1.75836	2.43601e-06
Cluster17	Cluster17	8.12002e-07	1.88348	2.43601e-06

## Sheet: MTG-missense
Supplementary Table 8D: Enrichment of ASD missense and LOF mutation genes across clusters
pathwayid	pathwayname	Pvalue	Oddsratio	FDR
Cluster0	Cluster0	3.18e-10	1.81469	3.58e-10
Cluster1	Cluster1	4.83e-06	1.76636	4.83e-06
Cluster2	Cluster2	5.99e-08	1.92254	6.34e-08
Cluster3	Cluster3	1.07e-13	1.98583	1.61e-13
Cluster4	Cluster4	4e-17	1.94469	9.01e-17
Cluster5	Cluster5	4.76e-17	1.8451	9.52e-17
Cluster6	Cluster6	2.26e-16	1.80574	4.08e-16
Cluster7	Cluster7	5.9e-15	2.09095	9.66e-15
Cluster8	Cluster8	1.28e-12	1.70005	1.78e-12
Cluster9	Cluster9	3.3e-19	1.82956	8.5e-19
Cluster10	Cluster10	1.88e-32	1.84769	3.38e-31
Cluster11	Cluster11	8.64e-26	1.7082	7.78e-25
Cluster12	Cluster12	5.15e-12	1.72565	6.46e-12
Cluster13	Cluster13	5.38e-12	1.88256	6.46e-12
Cluster14	Cluster14	1.72e-22	1.93605	7.75e-22
Cluster15	Cluster15	8.84e-21	1.96385	3.18e-20
Cluster16	Cluster16	1.5e-25	1.86529	9.01e-25
Cluster17	Cluster17	2.41e-19	1.85492	7.24e-19

[truncated: 23 more sheets: VISP-LOF, VISP-missense, ACC-exonic, ACC-multiple denovo, ACC-multiple mut, MTG-exonic, MTG-multiple denovo, MTG-multiple mut, VISP-exonic, VISP-multiple denovo, VISP-multiple mut, ACC-epilepsy, ACC-fmrI, ACC-ID, MTG-epilepsy, MTG-fmrI, MTG-ID, VISP-epilepsy, VISP-fmrI, VISP-ID …]
